# Supplementary material for: Socioeconomic Inequalities Impact the Ability of Pregnant Women and Women of Childbearing Age to Consume Nutrients Needed for Neurodevelopment: An Analysis of NHANES 2007–2018
Source: MDPI journal article supplement (doi:10.3390/nu14183823), 2022-09-16
Supplement: s1 [file s1]

# Socioeconomic Inequalities Impact the Ability of Pregnant Women and Women of Childbearing Age to Consume Nutrients Needed for Neurodevelopment; An Analysis of NHANES 2007-2018

## Supplementary Material

**Supplementary Table S1.** Total usual intakes of nutrients important for neurodevelopment (foods + dietary supplements) among *nonpregnant nonlactating* US women aged 20-44 y in the NHANES Survey by SNAP participation.

| Nutrient          | Household Recipient of SNAP in Past 12 Months |                |               |                 |
|-------------------|-----------------------------------------------|----------------|---------------|-----------------|
|                   | Yes, N=1,617                                  |                | No, N=4,031   |                 |
|                   | Mean (SE)                                     | % <EAR or [AI] | Mean (SE)     | % <EAR or [AI]  |
| Vitamin A, RAE/d  | 688 (32.3)                                    | 47.0 (2.80)    | 975 (40.1) *  | 28.3 (2.05) *   |
| Vitamin B6, mg/d  | 3.12 (0.24)                                   | 6.96 (1.50)    | 4.46 (0.25) * | 3.41 (0.82) *   |
| Vitamin B12, ug/d | 31.4 (5.58)                                   | --             | 43.5 (5.90) * | --              |
| Vitamin C, mg/d   | 100 (4.63)                                    | 40.1 (2.18)    | 151 (8.26) *  | 24.4 (1.48) *   |
| Vitamin D, mg/d   | 7.46 (0.36)                                   | 83.8 (1.04)    | 13.3 (1.17) * | 71.1 (0.97) *   |
| Vitamin E, mg/d   | 8.11 (0.45)                                   | 93.3 (1.10)    | 13.7 (1.97) * | 84.5 (1.75) *   |
| Vitamin K, ug/d   | 101 (3.19)                                    | [47.6 (2.18)]  | 131 (4.15) *  | [26.0 (2.70)] * |
| Zinc, mg/d        | 11.4 (0.20)                                   | 40.2 (2.25)    | 13.4 (0.23) * | 30.7 (1.74) *   |
| Iron, mg/d        | 15.8 (0.43)                                   | 6.45 (1.19)    | 17.8 (0.31) * | 4.25 (0.88) *   |
| Choline, mg/d     | 280 (4.94)                                    | [96.7 (0.88)]  | 296 (3.65) *  | [94.8 (1.04)]   |
| Folate, ug DFE/d  | 567 (12.8)                                    | 12.8 (1.77)    | 702 (14.0) *  | 7.49 (1.29) *   |
| Calcium, mg/d     | 929 (14.8)                                    | 37.5 (1.96)    | 1037 (14.2) * | 26.9 (1.57) *   |
| Magnesium, mg/d   | 253 (3.73)                                    | 58.1 (1.91)    | 300 (3.81) *  | 37.5 (1.60) *   |
| EPA + DHA, mg/d   | 46.9 (4.29)                                   | 95.0 (0.72)    | 65.8 (4.81) * | 93.6 (0.59)     |

\* indicates  $p < 0.05$  relative to those in households that received SNAP. % below for EPA + DHA represents those below recommendations for intake from the Dietary Guidelines for Americans.

**Supplementary Table S2.** Data on total usual intakes of nutrients important for neurodevelopment (foods alone) among *nonpregnant nonlactating* US women aged 20-44 in the National Health and Nutrition Examination Survey by PIR.

| Nutrient          | Low, N=2,763             |                            | Medium, N=1,209           |                            | High, N=1,336             |                            |
|-------------------|--------------------------|----------------------------|---------------------------|----------------------------|---------------------------|----------------------------|
|                   | Mean (SE)                | % <EAR or [AI]             | Mean (SE)                 | % <EAR or [AI]             | Mean (SE)                 | % <EAR or [AI]             |
| Vitamin A, RAE/d  | 555 (14.1) <sup>a</sup>  | 45.1 (2.60) <sup>d</sup>   | 638 (18.3) <sup>b</sup>   | 31.3 (3.10) <sup>e</sup>   | 680 (19.3) <sup>c</sup>   | 25.4 (3.03) <sup>f</sup>   |
| Vitamin B6, mg/d  | 1.84 (0.03)              | 11.0 (1.88)                | 1.98 (0.05)               | 7.59 (1.79)                | 2.03 (0.04)               | 6.72 (1.54)                |
| Vitamin B12, ug/d | 4.55 (0.11)              | --                         | 4.73 (0.12)               | --                         | 4.78 (0.12)               | --                         |
| Vitamin C, mg/d   | 75.6 (2.26) <sup>a</sup> | 41.2 (2.34) <sup>e</sup>   | 81.6 (2.89) <sup>b</sup>  | 35.5 (2.84) <sup>f</sup>   | 87.8 (2.46) <sup>c</sup>  | 30.2 (2.26) <sup>g</sup>   |
| Vitamin D, mg/d   | 4.13 (0.10) <sup>a</sup> | 98.3 (0.40) <sup>d</sup>   | 4.33 (0.14) <sup>b</sup>  | 97.9 (0.46) <sup>e</sup>   | 4.40 (0.14) <sup>b</sup>  | 97.7 (0.48) <sup>e</sup>   |
| Vitamin E, mg/d   | 7.57 (0.16) <sup>a</sup> | 93.4 (1.13) <sup>d</sup>   | 8.60 (0.23) <sup>b</sup>  | 87.2 (2.06) <sup>e</sup>   | 9.28 (0.22) <sup>c</sup>  | 81.8 (2.27) <sup>f</sup>   |
| Vitamin K, ug/d   | 105 (3.53) <sup>a</sup>  | [43.1 (3.22)] <sup>d</sup> | 121 (4.12) <sup>b</sup>   | [30.6 (3.25)] <sup>e</sup> | 138 (5.72) <sup>c</sup>   | [20.3 (3.55)] <sup>f</sup> |
| Zinc, mg/d        | 9.78 (0.13) <sup>a</sup> | 46.1 (2.07) <sup>d</sup>   | 10.2 (0.20) <sup>a</sup>  | 38.6 (3.21) <sup>e</sup>   | 10.5 (0.16) <sup>ab</sup> | 34.3 (2.69) <sup>e</sup>   |
| Iron, mg/d        | 12.9 (0.16) <sup>a</sup> | 3.97 (0.77) <sup>d</sup>   | 13.3 (0.24) <sup>ab</sup> | 3.02 (0.69) <sup>e</sup>   | 13.8 (0.21) <sup>b</sup>  | 1.94 (0.52) <sup>f</sup>   |
| Choline, mg/d     | 279 (3.79) <sup>a</sup>  | [97.1 (0.70)] <sup>d</sup> | 298 (6.14) <sup>b</sup>   | [94.9 (1.32)] <sup>e</sup> | 300 (5.23) <sup>b</sup>   | [94.7 (1.34)] <sup>e</sup> |
| Folate, ug DFE/d  | 474 (8.56) <sup>a</sup>  | 13.5 (1.91) <sup>d</sup>   | 496 (11.7) <sup>b</sup>   | 10.6 (1.68) <sup>e</sup>   | 517 (11.6) <sup>c</sup>   | 8.22 (1.81) <sup>f</sup>   |
| Calcium, mg/d     | 875 (12.3) <sup>a</sup>  | 39.2 (1.57) <sup>d</sup>   | 930 (15.9) <sup>b</sup>   | 32.2 (2.50) <sup>e</sup>   | 954 (15.5) <sup>c</sup>   | 28.8 (2.48) <sup>f</sup>   |
| Magnesium, mg/d   | 253 (3.86) <sup>a</sup>  | 56.2 (2.18) <sup>d</sup>   | 275 (4.37) <sup>b</sup>   | 44.4 (2.39) <sup>e</sup>   | 296 (4.82) <sup>c</sup>   | 34.0 (2.35) <sup>f</sup>   |

|                 |                          |                          |                           |                          |                          |                          |
|-----------------|--------------------------|--------------------------|---------------------------|--------------------------|--------------------------|--------------------------|
| EPA + DHA, mg/d | 47.4 (3.30) <sup>a</sup> | 95.8 (0.52) <sup>b</sup> | 49.5 (4.25) <sup>ab</sup> | 96.1 (0.65) <sup>b</sup> | 57.9 (4.20) <sup>b</sup> | 94.9 (0.77) <sup>b</sup> |
|-----------------|--------------------------|--------------------------|---------------------------|--------------------------|--------------------------|--------------------------|

Rows with different subscripts differ from each other,  $p < 0.05$ , low 0–1.85, medium >1.85–3.50, high >3.5. % below for EPA + DHA represents those below recommendations for intake from the Dietary Guidelines for Americans.

**Supplementary Table S3.** Data on total usual intakes of nutrients important for neurodevelopment (foods + dietary supplements) among *nonpregnant nonlactating* US women aged 20–44 in the National Health and Nutrition Examination Survey by PIR.

| Nutrient          | Low, N=2,763             |                            | Medium, N=1,209          |                            | High, N=1,336             |                            |
|-------------------|--------------------------|----------------------------|--------------------------|----------------------------|---------------------------|----------------------------|
|                   | Mean (SE)                | % <EAR or [AI]             | Mean (SE)                | % <EAR or [AI]             | Mean (SE)                 | % <EAR or [AI]             |
| Vitamin A, RAE/d  | 803 (46.7) <sup>a</sup>  | 41.7 (2.42) <sup>d</sup>   | 937 (64.0) <sup>b</sup>  | 28.4 (2.81) <sup>e</sup>   | 1027 (59.2) <sup>c</sup>  | 22.0 (2.69) <sup>f</sup>   |
| Vitamin B6, mg/d  | 3.19 (0.22) <sup>a</sup> | 5.66 (1.27) <sup>c</sup>   | 4.41 (0.40) <sup>a</sup> | 3.25 (0.96) <sup>c</sup>   | 5.29 (0.44) <sup>ab</sup> | 2.46 (0.74) <sup>cd</sup>  |
| Vitamin B12, ug/d | 48.0 (12.0) <sup>a</sup> | --                         | 38.9 (7.05) <sup>b</sup> | --                         | 37.8 (5.81) <sup>b</sup>  | --                         |
| Vitamin C, mg/d   | 112 (5.33) <sup>a</sup>  | 34.0 (1.96) <sup>c</sup>   | 156 (19.1) <sup>a</sup>  | 26.2 (2.18) <sup>c</sup>   | 165 (14.9) <sup>b</sup>   | 21.1 (1.59) <sup>cd</sup>  |
| Vitamin D, mg/d   | 8.70 (0.75) <sup>a</sup> | 80.3 (1.11) <sup>d</sup>   | 13.4 (3.21) <sup>b</sup> | 73.0 (1.50) <sup>e</sup>   | 15.6 (1.39) <sup>c</sup>  | 66.7 (1.54) <sup>f</sup>   |
| Vitamin E, mg/d   | 9.28 (0.72) <sup>a</sup> | 92.1 (1.20) <sup>d</sup>   | 14.1 (3.15) <sup>b</sup> | 85.8 (2.07) <sup>e</sup>   | 15.9 (4.00) <sup>c</sup>  | 79.9 (2.43) <sup>f</sup>   |
| Vitamin K, ug/d   | 108 (3.58) <sup>a</sup>  | [41.0 (3.09)] <sup>d</sup> | 125 (4.32) <sup>b</sup>  | [28.3 (3.03)] <sup>e</sup> | 146 (5.80) <sup>c</sup>   | [18.0 (3.11)] <sup>f</sup> |
| Zinc, mg/d        | 11.8 (0.21) <sup>b</sup> | 39.3 (1.87) <sup>d</sup>   | 13.1 (0.32) <sup>b</sup> | 30.3 (2.60) <sup>e</sup>   | 14.2 (0.33) <sup>c</sup>  | 25.6 (2.14) <sup>f</sup>   |
| Iron, mg/d        | 16.3 (0.34) <sup>a</sup> | 6.18 (1.12) <sup>d</sup>   | 17.4 (0.48) <sup>b</sup> | 4.96 (1.13) <sup>e</sup>   | 18.7 (0.45) <sup>c</sup>  | 3.31 (0.92) <sup>f</sup>   |
| Choline, mg/d     | 280 (3.79) <sup>a</sup>  | [97.0 (0.71)] <sup>c</sup> | 303 (6.47) <sup>b</sup>  | [94.3 (1.34)] <sup>d</sup> | 303 (6.13) <sup>b</sup>   | [94.3 (1.42)] <sup>d</sup> |
| Folate, ug DFE/d  | 594 (13.0) <sup>a</sup>  | 11.5 (1.60) <sup>d</sup>   | 699 (23.5) <sup>b</sup>  | 8.15 (1.28) <sup>e</sup>   | 752 (19.2) <sup>c</sup>   | 5.88 (1.34) <sup>f</sup>   |
| Calcium, mg/d     | 948 (14.0) <sup>a</sup>  | 35.1 (1.78) <sup>d</sup>   | 1038 (19.1) <sup>b</sup> | 26.2 (2.13) <sup>e</sup>   | 1091 (20.0) <sup>c</sup>  | 22.1 (2.08) <sup>f</sup>   |
| Magnesium, mg/d   | 266 (4.51) <sup>a</sup>  | 52.4 (2.12) <sup>d</sup>   | 291 (5.05) <sup>b</sup>  | 40.2 (2.30) <sup>e</sup>   | 324 (5.78) <sup>c</sup>   | 29.2 (2.09) <sup>f</sup>   |
| EPA + DHA, mg/d   | 50.2 (4.64) <sup>a</sup> | 94.8 (0.68) <sup>c</sup>   | 54.4 (5.56) <sup>a</sup> | 95.0 (0.83) <sup>c</sup>   | 74.1 (7.80) <sup>b</sup>  | 92.8 (0.97) <sup>c</sup>   |

Rows with different subscripts differ from each other,  $p < 0.05$ , -- indicates suppression due to relative standard errors >30%, low 0–1.85, medium >1.85–3.50, high >3.5. % below for EPA + DHA represents those below recommendations for intake from the Dietary Guidelines for Americans.

**Supplementary Table S4.** Data on total usual intakes of nutrients important for neurodevelopment (foods alone) among *nonpregnant nonlactating* US women aged 20–44 in the National Health and Nutrition Examination Survey by household food security.

| Nutrient          | Very low, N=539          |                            | Low, N=945               |                            | Marginal, N=805          |                            | Full, N=3,374            |                            |
|-------------------|--------------------------|----------------------------|--------------------------|----------------------------|--------------------------|----------------------------|--------------------------|----------------------------|
|                   | Mean (SE)                | % <EAR or [AI]             |
| Vitamin A, RAE/d  | 541 (16.0) <sup>a</sup>  | 47.7 (2.93) <sup>d</sup>   | 543 (16.7) <sup>a</sup>  | 47.8 (3.02) <sup>d</sup>   | 578 (22.8) <sup>b</sup>  | 41.2 (4.05) <sup>e</sup>   | 643 (14.6) <sup>c</sup>  | 31.0 (2.39) <sup>f</sup>   |
| Vitamin B6, mg/d  | 1.84 (0.04) <sup>a</sup> | 12.1 (2.00) <sup>c</sup>   | 1.84 (0.04) <sup>a</sup> | 11.7 (1.89) <sup>c</sup>   | 1.85 (0.05) <sup>a</sup> | 10.8 (2.13) <sup>d</sup>   | 1.98 (0.03) <sup>b</sup> | 7.69 (1.49) <sup>e</sup>   |
| Vitamin B12, ug/d | 4.46 (0.11) <sup>a</sup> | --                         | 4.45 (0.12) <sup>a</sup> | --                         | 4.65 (0.70) <sup>a</sup> | --                         | 4.72 (0.10) <sup>b</sup> | --                         |
| Vitamin C, mg/d   | 70.6 (2.46) <sup>a</sup> | 46.2 (2.72) <sup>d</sup>   | 70.9 (2.60) <sup>a</sup> | 46.2 (2.83) <sup>d</sup>   | 76.6 (3.31) <sup>b</sup> | 40.1 (3.37) <sup>e</sup>   | 85.3 (1.94) <sup>c</sup> | 32.1 (1.86) <sup>f</sup>   |
| Vitamin D, mg/d   | 4.00 (0.12) <sup>a</sup> | 98.7 (0.38) <sup>d</sup>   | 4.01 (0.12) <sup>a</sup> | 98.6 (0.38) <sup>d</sup>   | 4.20 (0.17) <sup>b</sup> | 98.3 (0.51) <sup>d</sup>   | 4.36 (0.11) <sup>c</sup> | 97.8 (0.41) <sup>d</sup>   |
| Vitamin E, mg/d   | 7.44 (0.18) <sup>a</sup> | 93.9 (1.28) <sup>d</sup>   | 7.47 (0.19) <sup>a</sup> | 93.4 (1.31) <sup>d</sup>   | 8.14 (0.30) <sup>b</sup> | 89.9 (2.07) <sup>e</sup>   | 8.69 (0.16) <sup>c</sup> | 86.2 (1.71) <sup>f</sup>   |
| Vitamin K, ug/d   | 101 (3.35) <sup>a</sup>  | [47.0 (3.01)] <sup>d</sup> | 101 (3.51) <sup>a</sup>  | [47.0 (3.06)] <sup>d</sup> | 116 (5.86) <sup>b</sup>  | [34.4 (4.60)] <sup>e</sup> | 125 (3.99) <sup>c</sup>  | [28.3 (2.96)] <sup>f</sup> |
| Zinc, mg/d        | 9.76 (0.18) <sup>a</sup> | 46.2 (3.13) <sup>b</sup>   | 9.76 (0.18) <sup>a</sup> | 46.6 (3.12) <sup>b</sup>   | 9.99 (0.24) <sup>a</sup> | 42.3 (4.06) <sup>b</sup>   | 10.3 (0.12) <sup>a</sup> | 38.3 (2.01) <sup>b</sup>   |
| Iron, mg/d        | 12.8 (0.22) <sup>a</sup> | 3.48 (0.81) <sup>c</sup>   | 12.8 (0.23) <sup>a</sup> | 3.63 (0.80) <sup>c</sup>   | 13.0 (0.33) <sup>a</sup> | 3.83 (0.88) <sup>d</sup>   | 13.5 (0.14) <sup>b</sup> | 2.55 (0.54) <sup>e</sup>   |
| Choline, mg/d     | 280 (5.74) <sup>a</sup>  | [96.9 (0.89)] <sup>c</sup> | 280 (5.86) <sup>a</sup>  | [96.7 (0.92)] <sup>c</sup> | 288 (7.16) <sup>a</sup>  | [96.0 (1.03)] <sup>c</sup> | 294 (3.94) <sup>b</sup>  | [95.1 (1.07)] <sup>c</sup> |
| Folate, ug DFE/d  | 466 (9.94) <sup>a</sup>  | 14.5 (2.18) <sup>c</sup>   | 466 (10.2) <sup>a</sup>  | 14.4 (2.18) <sup>c</sup>   | 478 (14.7) <sup>a</sup>  | 12.4 (2.26) <sup>cd</sup>  | 504 (8.28) <sup>ab</sup> | 9.21 (1.64) <sup>d</sup>   |
| Calcium, mg/d     | 858 (15.2) <sup>a</sup>  | 43.1 (2.37) <sup>c</sup>   | 861 (15.7) <sup>a</sup>  | 42.9 (2.41) <sup>c</sup>   | 896 (11.9) <sup>b</sup>  | 37.2 (3.72) <sup>c</sup>   | 929 (10.8) <sup>b</sup>  | 32.5 (1.85) <sup>d</sup>   |
| Magnesium, mg/d   | 252 (4.76) <sup>a</sup>  | 56.8 (2.67) <sup>c</sup>   | 253 (4.99) <sup>a</sup>  | 56.8 (2.86) <sup>c</sup>   | 260 (5.94) <sup>a</sup>  | 52.5 (3.30) <sup>c</sup>   | 280 (3.15) <sup>b</sup>  | 41.9 (1.58) <sup>d</sup>   |
| EPA + DHA, mg/d   | 47.7 (10.4) <sup>b</sup> | 95.6 (1.38) <sup>b</sup>   | 53.2 (2.65) <sup>a</sup> | 95.8 (0.81) <sup>b</sup>   | 47.8 (5.97) <sup>b</sup> | 95.7 (0.88) <sup>b</sup>   | 49.1 (4.95) <sup>b</sup> | 95.3 (0.46) <sup>b</sup>   |

-- indicates suppression due to relative standard errors >30%, rows with different subscripts differ from each other,  $p < 0.05$ . % below for EPA + DHA represents those below recommendations for intake from the Dietary Guidelines for Americans.

**Supplementary Table S5.** Data on total usual intakes of nutrients important for neurodevelopment (foods + dietary supplements) among *nonpregnant nonlactating* US women aged 20–44 in the National Health and Nutrition Examination Survey by household food security.

| Nutrient          | Very low, N=539          |                            | Low, N=945                |                            | Marginal, N=805           |                            | Full, N=3,374            |                            |
|-------------------|--------------------------|----------------------------|---------------------------|----------------------------|---------------------------|----------------------------|--------------------------|----------------------------|
|                   | Mean (SE)                | % <EAR or [AI]             | Mean (SE)                 | % <EAR or [AI]             | Mean (SE)                 | % <EAR or [AI]             | Mean (SE)                | % <EAR or [AI]             |
| Vitamin A, RAE/d  | 685 (42.7) <sup>a</sup>  | 48.3 (3.66) <sup>d</sup>   | 748 (48.7) <sup>ab</sup>  | 32.3 (3.25) <sup>e</sup>   | 813 (70.5) <sup>b</sup>   | 38.2 (3.79) <sup>e</sup>   | 989 (42.3) <sup>c</sup>  | 27.6 (2.11) <sup>f</sup>   |
| Vitamin B6, mg/d  | 2.73 (0.21) <sup>a</sup> | 7.52 (1.77) <sup>c</sup>   | 3.30 (0.36) <sup>a</sup>  | 5.19 (1.23) <sup>d</sup>   | 2.99 (0.21) <sup>a</sup>  | 5.62 (1.41) <sup>d</sup>   | 4.71 (0.29) <sup>b</sup> | 3.35 (0.85) <sup>e</sup>   |
| Vitamin B12, ug/d | 24.9 (5.67) <sup>a</sup> | 3.93 (1.57)                | 48.7 (10.6) <sup>b</sup>  | --                         | 32.2 (8.64) <sup>ab</sup> | --                         | 42.6 (6.67) <sup>b</sup> | --                         |
| Vitamin C, mg/d   | 109 (13.7) <sup>a</sup>  | 44.0 (3.41) <sup>c</sup>   | 130 (24.9) <sup>ab</sup>  | 34.6 (2.81) <sup>d</sup>   | 124 (10.1) <sup>ab</sup>  | 32.4 (2.91) <sup>d</sup>   | 148 (7.76) <sup>b</sup>  | 23.6 (1.45) <sup>e</sup>   |
| Vitamin D, mg/d   | 10.8 (3.53) <sup>a</sup> | 82.9 (2.15) <sup>d</sup>   | 8.10 (0.55) <sup>b</sup>  | 79.9 (1.69) <sup>d</sup>   | 9.40 (0.79) <sup>ab</sup> | 79.7 (2.19) <sup>d</sup>   | 13.4 (1.29) <sup>c</sup> | 70.6 (1.08) <sup>e</sup>   |
| Vitamin E, mg/d   | 8.43 (1.08) <sup>a</sup> | 94.2 (1.37) <sup>d</sup>   | 8.53 (0.53) <sup>a</sup>  | 91.7 (1.59) <sup>d</sup>   | 10.2 (1.54) <sup>b</sup>  | 89.4 (2.09) <sup>de</sup>  | 14.1 (2.27) <sup>c</sup> | 83.9 (1.79) <sup>f</sup>   |
| Vitamin K, ug/d   | 96.0 (3.88) <sup>a</sup> | [51.6 (3.55)] <sup>d</sup> | 109 (4.24) <sup>a</sup>   | [41.1 (3.36)] <sup>d</sup> | 120 (6.07) <sup>b</sup>   | [32.5 (4.48)] <sup>e</sup> | 131 (4.11) <sup>c</sup>  | [25.8 (2.68)] <sup>f</sup> |
| Zinc, mg/d        | 11.2 (0.38) <sup>a</sup> | 44.9 (4.28) <sup>c</sup>   | 12.1 (0.37) <sup>a</sup>  | 37.3 (3.17) <sup>c</sup>   | 12.2 (0.37) <sup>a</sup>  | 35.4 (3.34) <sup>d</sup>   | 13.4 (0.23) <sup>b</sup> | 30.0 (1.67) <sup>e</sup>   |
| Iron, mg/d        | 15.9 (0.86) <sup>a</sup> | 8.36 (1.87) <sup>c</sup>   | 16.8 (0.67) <sup>a</sup>  | 5.21 (1.27) <sup>d</sup>   | 16.7 (0.65) <sup>a</sup>  | 5.40 (1.26) <sup>d</sup>   | 17.8 (0.29) <sup>b</sup> | 4.04 (0.85) <sup>d</sup>   |
| Choline, mg/d     | 271 (7.32) <sup>a</sup>  | [97.7 (0.78)] <sup>c</sup> | 288 (7.95) <sup>a</sup>   | [95.6 (1.34)] <sup>c</sup> | 289 (7.21) <sup>b</sup>   | [95.8 (1.06)] <sup>c</sup> | 297 (3.92) <sup>b</sup>  | [94.8 (1.08)] <sup>d</sup> |
| Folate, ug DFE/d  | 562 (27.8) <sup>a</sup>  | 15.8 (2.71) <sup>d</sup>   | 605 (18.9) <sup>b</sup>   | 10.4 (1.86) <sup>e</sup>   | 609 (22.0) <sup>b</sup>   | 10.1 (1.85) <sup>e</sup>   | 709 (14.5) <sup>c</sup>  | 6.97 (1.27) <sup>f</sup>   |
| Calcium, mg/d     | 919 (27.4) <sup>a</sup>  | 39.7 (3.33) <sup>c</sup>   | 953 (21.9) <sup>ab</sup>  | 35.2 (2.50) <sup>c</sup>   | 978 (25.5) <sup>b</sup>   | 32.2 (3.29) <sup>d</sup>   | 1042 (14.3) <sup>b</sup> | 26.3 (1.62) <sup>e</sup>   |
| Magnesium, mg/d   | 254 (6.50) <sup>a</sup>  | 58.1 (3.21) <sup>d</sup>   | 271 (6.82) <sup>b</sup>   | 50.8 (3.17) <sup>e</sup>   | 276 (7.66) <sup>a</sup>   | 48.6 (3.34) <sup>e</sup>   | 301 (3.65) <sup>bc</sup> | 37.2 (1.49) <sup>f</sup>   |
| EPA + DHA, mg/d   | 48.6 (10.3) <sup>b</sup> | 95.2 (1.39) <sup>c</sup>   | 54.0 (9.25) <sup>ab</sup> | 95.1 (0.84) <sup>c</sup>   | 46.4 (5.04) <sup>b</sup>  | 96.0 (0.79) <sup>c</sup>   | 64.2 (4.31) <sup>a</sup> | 93.4 (0.60) <sup>c</sup>   |

Rows with different subscripts differ from each other,  $p < 0.05$ , -- indicates suppression due to relative standard errors  $> 30\%$ . % below for EPA + DHA represents those below recommendations for intake from the Dietary Guidelines for Americans.

**Supplementary Table S6.** Total usual intakes of nutrients important for neurodevelopment (foods + dietary supplements) among *pregnant nonlactating* US women aged 20–44 y in the NHANES Survey by WIC participation.

| Nutrient          | Household recipient of WIC in past 12 months |                |              |                |
|-------------------|----------------------------------------------|----------------|--------------|----------------|
|                   | Yes, N=124                                   |                | No, N=191    |                |
|                   | Mean (SE)                                    | % <EAR or [AI] | Mean (SE)    | % <EAR or [AI] |
| Vitamin A, RAE/d  | 1484 (315)                                   | 27.1 (7.36)    | 1755 (292)   | 18.9 (5.10)    |
| Vitamin B6, mg/d  | 4.20 (0.59)                                  | —              | —            | —              |
| Vitamin B12, ug/d | 9.24 (0.78)                                  | —              | —            | —              |
| Vitamin C, mg/d   | 149 (13.8)                                   | 22.8 (4.74)    | 181 (12.9)*  | 11.4 (2.59)*   |
| Vitamin D, mg/d   | 10.7 (1.27)                                  | 56.9 (6.33)    | 14.1 (1.08)* | 41.8 (4.53)*   |
| Vitamin E, mg/d   | 9.41 (1.37)                                  | 90.7 (3.92)    | 10.5 (0.65)  | 79.9 (6.28)    |
| Vitamin K, ug/d   | 103 (12.0)                                   | [47.8 (10.3)]  | 148 (13.7)*  | —              |
| Zinc, mg/d        | 18.9 (1.40)                                  | 19.0 (6.06)    | 21.3 (1.02)  | 11.9 (3.05)*   |
| Iron, mg/d        | 28.8 (2.37)                                  | 54.1 (6.57)    | 35.6 (3.05)* | 38.4 (4.37)*   |
| Choline, mg/d     | 298 (16.8)                                   | [97.2 (2.50)]  | 311 (13.9)   | [96.1 (2.97)]  |
| Folate, ug DFE/d  | 1191 (107)                                   | 23.2 (6.99)    | 1477 (79.1)* | 14.4 (2.84)*   |
| Calcium, mg/d     | 1234 (90.2)                                  | 15.5 (5.04)    | 1337 (62.3)  | —              |
| Magnesium, mg/d   | 286 (13.7)                                   | 55.0 (7.22)    | 325 (13.0)*  | 38.5 (5.82)*   |
| EPA + DHA, mg/d   | 52.9 (15.0)                                  | 95.0 (2.39)    | 83.8 (21.1)* | 94.0 (1.91)*   |

-- indicates suppression due to relative standard errors  $> 30\%$ , \* indicates  $p < 0.05$  relative to those in households that received WIC. % below for EPA + DHA represents those below recommendations for intake from the Dietary Guidelines for Americans.

**Supplementary Table S7.** Total usual intakes of nutrients important for neurodevelopment (foods + dietary supplements) among *pregnant nonlactating* US women aged 20–44 y in the NHANES Survey by SNAP participation.

#### Household recipient of SNAP in past 12 months

| Nutrient          | Yes, N=112  |                | No, N=204    |                |
|-------------------|-------------|----------------|--------------|----------------|
|                   | Mean (SE)   | % <EAR or [AI] | Mean (SE)    | % <EAR or [AI] |
| Vitamin A, RAE/d  |             |                |              |                |
| Vitamin B6, mg/d  | 3.09 (0.33) | —              | 11.9 (4.46)  | —              |
| Vitamin B12, ug/d | 7.70 (0.74) | —              | —            | —              |
| Vitamin C, mg/d   | 125 (10.0)  | 29.6 (5.51)    | 186 (12.9)*  | 10.2 (2.22)*   |
| Vitamin D, mg/d   | 8.78 (0.98) | 67.0 (5.78)    | 14.4 (1.13)* | 39.5 (4.19)*   |
| Vitamin E, mg/d   | 7.34 (0.64) | 96.3 (2.95)    | 11.1 (0.76)* | 79.1 (6.14)*   |
| Vitamin K, ug/d   | 87.0 (9.99) | [60.6 (9.80)]  | 149 (13.6)*  | —              |
| Zinc, mg/d        | 17.1 (1.43) | —              | 22.0 (0.99)* | —              |
| Iron, mg/d        | 24.8 (2.05) | 65.5 (5.68)    | 36.8 (2.83)* | 34.9 (4.27)*   |
| Choline, mg/d     | 285 (18.9)  | [98.4 (2.32)]  | 315 (13.2)*  | 96.0 (2.98)*   |
| Folate, ug DFE/d  | 948 (90.9)  | 33.7 (8.79)    | 1556 (74.2)* | —              |
| Calcium, mg/d     | 1169 (73.1) | —              | 1372 (67.3)* | —              |
| Magnesium, mg/d   | 275 (15.9)  | 65.7 (7.10)    | 327 (10.8)*  | 35.3 (5.38)*   |
| EPA + DHA, mg/d   | 47.3 (11.3) | 96.4 (1.78)    | 87.6 (21.9)* | 93.3 (2.04)*   |

-- indicates suppression due to relative standard errors >30%, \*indicates p<0.05 relative to those in households who received SNAP, % below for EPA + DHA represents those below recommendations for intake from the Dietary Guidelines for Americans.

**Supplementary Table S8.** Data on total usual intakes of nutrients important for neurodevelopment (foods alone) among *pregnant nonlactating* US women aged 20-44 in the National Health and Nutrition Examination Survey by PIR.

| Nutrient          | Low, N=162               |                            | Medium, N=60             |                            | High, N=70               |                            |
|-------------------|--------------------------|----------------------------|--------------------------|----------------------------|--------------------------|----------------------------|
|                   | Mean (SE)                | % <EAR or [AI]             | Mean (SE)                | % <EAR or [AI]             | Mean (SE)                | % <EAR or [AI]             |
| Vitamin A, RAE/d  | 639 (44.5) <sup>a</sup>  | 38.4 (9.28) <sup>c</sup>   | 740 (73.4) <sup>b</sup>  | --                         | 765 (73.0) <sup>b</sup>  | --                         |
| Vitamin B6, mg/d  | 1.92 (0.10) <sup>a</sup> | 31.2 (7.99) <sup>b</sup>   | 1.99 (0.14) <sup>a</sup> | 26.0 (8.38) <sup>b</sup>   | 2.17 (0.17) <sup>a</sup> | 16.8 (5.71) <sup>c</sup>   |
| Vitamin B12, ug/d | 4.99 (0.38) <sup>a</sup> | --                         | 4.74 (0.45) <sup>a</sup> | --                         | 5.23 (0.47) <sup>a</sup> | --                         |
| Vitamin C, mg/d   | 101 (7.40) <sup>a</sup>  | 33.0 (6.24) <sup>b</sup>   | 114 (16.6) <sup>a</sup>  | --                         | 114 (12.0) <sup>a</sup>  | 23.7 (6.66) <sup>b</sup>   |
| Vitamin D, mg/d   | 5.49 (0.51) <sup>a</sup> | 93.2 (3.25) <sup>b</sup>   | 5.21 (0.75) <sup>a</sup> | 94.5 (3.98) <sup>b</sup>   | 5.16 (0.54) <sup>a</sup> | 94.7 (3.16) <sup>b</sup>   |
| Vitamin E, mg/d   | 7.15 (0.48) <sup>a</sup> | 96.6 (2.43) <sup>c</sup>   | 9.64 (0.69) <sup>b</sup> | 81.3 (8.35) <sup>d</sup>   | 10.1 (0.77) <sup>b</sup> | 75.6 (9.54) <sup>d</sup>   |
| Vitamin K, ug/d   | 93.7 (9.62) <sup>a</sup> | [54.3 (9.92)]              | 144 (14.2) <sup>b</sup>  | --                         | 156 (18.0) <sup>b</sup>  | --                         |
| Zinc, mg/d        | 10.6 (0.59) <sup>a</sup> | --                         | 11.7 (0.91) <sup>b</sup> | --                         | 11.9 (0.65) <sup>b</sup> | --                         |
| Iron, mg/d        | 15.2 (0.92) <sup>a</sup> | 96.6 (3.27) <sup>b</sup>   | 16.4 (1.35) <sup>a</sup> | 94.7 (5.61) <sup>b</sup>   | 16.6 (1.02) <sup>a</sup> | 93.0 (6.24) <sup>b</sup>   |
| Choline, mg/d     | 291 (16.2) <sup>a</sup>  | [96.9 (2.49)] <sup>b</sup> | 315 (19.6) <sup>c</sup>  | [95.2 (3.75)] <sup>b</sup> | 315 (21.2) <sup>c</sup>  | [94.5 (2.83)] <sup>b</sup> |
| Folate, ug DFE/d  | 547 (39.4) <sup>c</sup>  | 47.3 (10.8) <sup>c</sup>   | 635 (65.5) <sup>c</sup>  | 27.2 (14.1) <sup>d</sup>   | 617 (42.2) <sup>a</sup>  | 31.8 (10.6) <sup>d</sup>   |
| Calcium, mg/d     | 1098 (56.5) <sup>a</sup> | --                         | 1164 (97.1) <sup>a</sup> | --                         | 1111 (73.4) <sup>a</sup> | --                         |
| Magnesium, mg/d   | 275 (11.8) <sup>a</sup>  | 61.2 (6.22) <sup>c</sup>   | 319 (16.6) <sup>b</sup>  | 37.3 (8.66) <sup>d</sup>   | 313 (16.3) <sup>b</sup>  | 42.7 (8.54) <sup>d</sup>   |
| EPA + DHA, mg/d   | 47.9 (7.47) <sup>a</sup> | 97.3 (0.87) <sup>bc</sup>  | 49.4 (12.9) <sup>a</sup> | 94.5 (2.97) <sup>b</sup>   | 44.1 (13.2) <sup>a</sup> | 99.2 (0.84) <sup>bc</sup>  |

-- indicates suppression due to relative standard errors >30%, rows with different subscripts differ from each other, p<0.05, low 0-1.85, medium >1.85-3.50, high >3.5. % below for EPA + DHA represents those below recommendations for intake from the Dietary Guidelines for Americans.

**Supplementary Table S9.** Data on total usual intakes of nutrients important for neurodevelopment (foods + dietary supplements) among *pregnant nonlactating* US women aged 20-44 in the National Health and Nutrition Examination Survey by PIR.

| Nutrient          | Low, N=162               |                | Medium, N=60             |                | High, N=70               |                |
|-------------------|--------------------------|----------------|--------------------------|----------------|--------------------------|----------------|
|                   | Mean (SE)                | % <EAR or [AI] | Mean (SE)                | % <EAR or [AI] | Mean (SE)                | % <EAR or [AI] |
| Vitamin A, RAE/d  | 1059 (111) <sup>a</sup>  | 34.4 (7.52)    | 1168 (144) <sup>ab</sup> | —              | 2211 (511) <sup>b</sup>  | —              |
| Vitamin B6, mg/d  | 5.56 (1.45) <sup>a</sup> | —              | —                        | —              | 7.52 (1.24) <sup>b</sup> | —              |
| Vitamin B12, ug/d | —                        | —              | 15.3 (3.81)              | —              | —                        | —              |
| Vitamin C, mg/d   | 162 (15.9) <sup>a</sup>  | 23.6 (4.63)    | 175 (19.8) <sup>a</sup>  | —              | 179 (16.7) <sup>a</sup>  | —              |

|                  |                          |                            |                          |                            |                          |                            |
|------------------|--------------------------|----------------------------|--------------------------|----------------------------|--------------------------|----------------------------|
| Vitamin D, mg/d  | 10.3 (1.07) <sup>a</sup> | 61.5 (5.05) <sup>c</sup>   | 18.7 (2.68) <sup>b</sup> | 29.4 (7.22) <sup>d</sup>   | 12.6 (1.28) <sup>a</sup> | 43.8 (6.66) <sup>e</sup>   |
| Vitamin E, mg/d  | 8.30 (1.12) <sup>a</sup> | 95.4 (2.54) <sup>c</sup>   | 10.3 (0.78) <sup>b</sup> | 78.8 (8.20) <sup>c</sup>   | 12.0 (1.03) <sup>b</sup> | 71.2 (8.76) <sup>d</sup>   |
| Vitamin K, ug/d  | 96.1 (9.81) <sup>a</sup> | [52.7 (9.66)]              | 158 (15.6) <sup>b</sup>  | –                          | 160 (18.2) <sup>b</sup>  | –                          |
| Zinc, mg/d       | 96.1 (9.81) <sup>a</sup> | 52.7 (9.66)                | 158 (15.6) <sup>b</sup>  | –                          | 160 (18.2) <sup>b</sup>  | –                          |
| Iron, mg/d       | 26.2 (2.31) <sup>a</sup> | 64.9 (5.03) <sup>c</sup>   | 36.0 (3.12) <sup>b</sup> | 26.1 (6.33) <sup>f</sup>   | 38.8 (5.47) <sup>b</sup> | 32.4 (6.65) <sup>e</sup>   |
| Choline, mg/d    | 291 (16.1) <sup>a</sup>  | [96.8 (2.50)] <sup>b</sup> | 316 (19.5) <sup>a</sup>  | [96.8 (2.50)] <sup>b</sup> | 317 (21.2) <sup>a</sup>  | [94.4 (3.97)] <sup>b</sup> |
| Folate, ug DFE/d | 1038 (82.9) <sup>a</sup> | 30.7 (7.24) <sup>c</sup>   | 1567 (117) <sup>b</sup>  | –                          | 1647 (121) <sup>b</sup>  | 10.4 (3.46) <sup>d</sup>   |
| Calcium, mg/d    | 1200 (58.6) <sup>a</sup> | –                          | 1389 (133) <sup>a</sup>  | –                          | 1312 (85.3) <sup>a</sup> | –                          |
| Magnesium, mg/d  | 282 (12.5) <sup>a</sup>  | 58.3 (6.21) <sup>c</sup>   | 338 (18.5) <sup>b</sup>  | 29.8 (8.46) <sup>d</sup>   | 326 (16.7) <sup>ab</sup> | 38.1 (7.83) <sup>cd</sup>  |
| EPA + DHA, mg/d  | 57.3 (10.4) <sup>a</sup> | 95.2 (1.72) <sup>c</sup>   | 50.6 (10.9) <sup>a</sup> | 95.5 (2.29) <sup>c</sup>   | 104 (35.3) <sup>b</sup>  | 93.6 (2.86) <sup>c</sup>   |

Rows with different subscripts differ from each other,  $p < 0.05$ , -- indicates suppression due to relative standard errors  $> 30\%$ . % below for EPA + DHA represents those below recommendations for intake from the Dietary Guidelines for Americans.

**Supplementary Table S10.** Data on total usual intakes of nutrients important for neurodevelopment (foods alone) among *pregnant nonlactating* US women aged 20–44 in the National Health and Nutrition Examination Survey by household food security.

| Nutrient          | Very low to low, N=99     |                             | Marginal, N=41           |                            | Full, N=176              |                            |
|-------------------|---------------------------|-----------------------------|--------------------------|----------------------------|--------------------------|----------------------------|
|                   | Mean (SE)                 | % <EAR or [AI]              | Mean (SE)                | % <EAR or [AI]             | Mean (SE)                | % <EAR or [AI]             |
| Vitamin A, RAE/d  | 648 (64.8) <sup>a</sup>   | --                          | 567 (63.4) <sup>b</sup>  | 50.7 (12.5)                | 796 (57.1) <sup>a</sup>  | --                         |
| Vitamin B6, mg/d  | 1.87 (0.12) <sup>ab</sup> | --                          | 1.67 (0.16) <sup>a</sup> | 47.8 (14.4) <sup>c</sup>   | 2.18 (0.12) <sup>b</sup> | 12.5 (5.98) <sup>d</sup>   |
| Vitamin B12, ug/d | 4.93 (0.56) <sup>ab</sup> | --                          | 4.10 (0.54) <sup>b</sup> | --                         | 5.56 (0.38) <sup>a</sup> | --                         |
| Vitamin C, mg/d   | 81.3 (9.24) <sup>a</sup>  | 48.4 (9.05) <sup>d</sup>    | 99.1 (13.8) <sup>b</sup> | 34.9 (9.97) <sup>d</sup>   | 120 (9.61) <sup>c</sup>  | 20.4 (4.62) <sup>e</sup>   |
| Vitamin D, mg/d   | 4.95 (0.55) <sup>ab</sup> | 96.1 (2.38) <sup>cd</sup>   | 4.40 (0.72) <sup>a</sup> | 97.6 (2.36) <sup>c</sup>   | 5.61 (0.43) <sup>b</sup> | 93.5 (3.21) <sup>d</sup>   |
| Vitamin E, mg/d   | 8.26 (0.69) <sup>ab</sup> | 90.9 (4.49) <sup>cd</sup>   | 7.97 (0.89) <sup>b</sup> | 92.6 (5.96) <sup>d</sup>   | 9.34 (0.57) <sup>a</sup> | 83.1 (6.64) <sup>c</sup>   |
| Vitamin K, ug/d   | 104 (13.0) <sup>a</sup>   | --                          | 115 (23.1) <sup>ab</sup> | --                         | 139 (13.5) <sup>b</sup>  | --                         |
| Zinc, mg/d        | 10.8 (0.74) <sup>ab</sup> | --                          | 9.10 (0.94) <sup>a</sup> | 60.3 (22.5)                | 12.2 (0.48) <sup>b</sup> | --                         |
| Iron, mg/d        | 14.8 (1.11) <sup>c</sup>  | 99.1 (1.77) <sup>de</sup>   | 12.2 (1.40) <sup>b</sup> | 100 (0.37) <sup>e</sup>    | 17.4 (0.75) <sup>a</sup> | 94.2 (6.19) <sup>d</sup>   |
| Choline, mg/d     | 283 (19.0) <sup>ab</sup>  | [98.4 (2.05)] <sup>cd</sup> | 274 (32.1) <sup>a</sup>  | [98.6 (2.33)] <sup>d</sup> | 321 (14.8) <sup>b</sup>  | [95.7 (3.37)] <sup>c</sup> |
| Folate, ug DFE/d  | 564 (54.9) <sup>a</sup>   | 42.2 (18.6) <sup>d</sup>    | 464 (58.2) <sup>b</sup>  | 68.4 (18.2) <sup>e</sup>   | 636 (32.0) <sup>c</sup>  | 25.3 (11.5) <sup>f</sup>   |
| Calcium, mg/d     | 1074 (74.8) <sup>ab</sup> | --                          | 987 (112) <sup>b</sup>   | --                         | 1169 (51.4) <sup>a</sup> | 51.4 (11.0)                |
| Magnesium, mg/d   | 271 (10.3) <sup>ab</sup>  | 63.6 (6.05) <sup>cd</sup>   | 266 (18.9) <sup>b</sup>  | 68.2 (11.0) <sup>d</sup>   | 317 (12.4) <sup>a</sup>  | 38.4 (7.43) <sup>c</sup>   |
| EPA + DHA, mg/d   | 30.9 (8.45) <sup>a</sup>  | 98.9 (0.79) <sup>b</sup>    | --                       | 91.8 (5.86) <sup>b</sup>   | 47.7 (13.3) <sup>a</sup> | 98.2 (0.78) <sup>b</sup>   |

-- indicates suppression due to relative standard errors  $> 30\%$ , rows with different subscripts differ from each other,  $p < 0.05$ . % below for EPA + DHA represents those below recommendations for intake from the Dietary Guidelines for Americans.

**Supplementary Table S11.** Data on total usual intakes of nutrients important for neurodevelopment (foods + dietary supplements) among *pregnant nonlactating* US women aged 20–44 in the National Health and Nutrition Examination Survey by household food security.

| Nutrient          | Very low to low, N=70     |                            | Marginal, N=60           |                            | Full, N=162              |                            |
|-------------------|---------------------------|----------------------------|--------------------------|----------------------------|--------------------------|----------------------------|
|                   | Mean (SE)                 | % <EAR or [AI]             | Mean (SE)                | % <EAR or [AI]             | Mean (SE)                | % <EAR or [AI]             |
| Vitamin A, RAE/d  | 1382 (353) <sup>ab</sup>  | 31.5 (10.7) <sup>c</sup>   | 1004 (261) <sup>b</sup>  | 46.1 (11.5) <sup>d</sup>   | 1916 (308) <sup>b</sup>  | 12.1 (5.26) <sup>e</sup>   |
| Vitamin B6, mg/d  | 3.58 (0.51) <sup>a</sup>  | –                          | 5.57 (1.07) <sup>b</sup> | –                          | 12.8 (5.31) <sup>c</sup> | –                          |
| Vitamin B12, ug/d | 10.1 (1.77) <sup>a</sup>  | –                          | 9.42 (1.12) <sup>a</sup> | –                          | –                        | –                          |
| Vitamin C, mg/d   | 136 (16.5) <sup>a</sup>   | 30.1 (4.95) <sup>d</sup>   | 149 (16.1) <sup>b</sup>  | 15.3 (6.07) <sup>e</sup>   | 188 (14.0) <sup>c</sup>  | 8.76 (2.53) <sup>e</sup>   |
| Vitamin D, mg/d   | 9.31 (0.99) <sup>a</sup>  | 62.8 (6.99) <sup>c</sup>   | 12.4 (1.99) <sup>a</sup> | 44.1 (10.7) <sup>c</sup>   | 14.6 (1.29) <sup>b</sup> | 40.4 (4.86) <sup>d</sup>   |
| Vitamin E, mg/d   | 8.30 (0.69) <sup>ab</sup> | 90.6 (4.47) <sup>d</sup>   | 11.3 (3.59) <sup>a</sup> | 90.3 (6.34) <sup>c</sup>   | 10.7 (0.72) <sup>a</sup> | 79.2 (6.30) <sup>c</sup>   |
| Vitamin K, ug/d   | 105 (13.2) <sup>b</sup>   | [45.6 (10.5)] <sup>d</sup> | 129 (25.8) <sup>a</sup>  | [34.3 (14.7)] <sup>c</sup> | 145 (13.6) <sup>a</sup>  | [21.9 (8.08)] <sup>c</sup> |
| Zinc, mg/d        | 18.1 (1.74) <sup>a</sup>  | –                          | 16.9 (2.12) <sup>a</sup> | 26.5 (8.15)                | 22.5 (1.08) <sup>b</sup> | –                          |
| Iron, mg/d        | 27.5 (3.02) <sup>a</sup>  | 60.4 (8.41) <sup>c</sup>   | 24.9 (3.14) <sup>a</sup> | 52.6 (10.5) <sup>d</sup>   | 37.7 (3.37) <sup>b</sup> | 34.9 (4.66) <sup>e</sup>   |
| Choline, mg/d     | 283 (19.1) <sup>a</sup>   | [98.4 (2.05)] <sup>b</sup> | 275 (32.0) <sup>a</sup>  | [98.6 (2.39)] <sup>b</sup> | 322 (14.9) <sup>a</sup>  | [95.5 (3.44)] <sup>b</sup> |

|                  |                          |                          |                           |                           |                          |                          |
|------------------|--------------------------|--------------------------|---------------------------|---------------------------|--------------------------|--------------------------|
| Folate, ug DFE/d | 982 (172) <sup>a</sup>   | –                        | 1189 (119) <sup>a</sup>   | 26.2 (8.14)               | 1565 (90.3) <sup>b</sup> | –                        |
| Calcium, mg/d    | 1275 (124) <sup>ab</sup> | –                        | 1096 (135) <sup>a</sup>   | –                         | 1377 (63.0) <sup>b</sup> | –                        |
| Magnesium, mg/d  | 287 (14.9) <sup>a</sup>  | 59.4 (6.26) <sup>c</sup> | 276 (20.9) <sup>a</sup>   | 64.7 (11.4) <sup>c</sup>  | 332 (13.3) <sup>b</sup>  | 32.5 (6.91) <sup>d</sup> |
| EPA +DHA, mg/d   | 87.4 (22.0) <sup>a</sup> | 97.1 (1.85) <sup>c</sup> | 73.5 (31.3) <sup>ab</sup> | 93.9 (4.44) <sup>cd</sup> | 40.4 (11.4) <sup>b</sup> | 93.3 (2.02) <sup>d</sup> |

Rows with different subscripts differ from each other,  $p < 0.05$ , -- indicates suppression due to relative standard errors >30%. % below for EPA + DHA represents those below recommendations for intake from the Dietary Guidelines for Americans.
